# Supplementary material
Source: PubMed Central journal article supplement (PMC5997408)
Supplement: tx7b00289_si_001.pdf [file tx7b00289_si_001.pdf]

## Supporting Information

### Reduction and scavenging of chemically reactive drug metabolites by NAD(P)H:quinone oxidoreductase 1 and NRH:quinone oxidoreductase 2 and variability in hepatic concentrations

Shaleni P. den Braver-Sewradj<sup>#</sup>, Michiel W. den Braver<sup>#</sup>, Robin M. Toorneman, Stephanie van Leeuwen, Yongjie Zhang, Stefan J. Dekker, Nico P.E. Vermeulen, Jan N.M. Commandeur and J. Chris Vos\*

AIMMS-Division of Molecular Toxicology, Department of Chemistry and Pharmaceutical sciences, Vrije Universiteit, De Boelelaan 1108, 1081 HZ Amsterdam, The Netherlands

<sup>#</sup> Authors contributed equally to this study.

\* Corresponding author: *Phone:* +31 205987569, *E-mail address:* [j.c.vos@vu.nl](mailto:j.c.vos@vu.nl)

#### Table of Contents:

**Table S1** Cytosolic protein contents of 20 liver preparations.

**Table S2** Inhibition of recombinant NQO1 and NQO2 by parent drugs used in this study.

**Figure S1** Calibration curves of resorufin, recombinant NQO1 activity in resorufin reduction, CB1954 and recombinant NQO2 activity in CB1954 reduction.

**Figure S2** Enzyme kinetics of co-substrate NRH oxidation by NQO2.

**Figure S3** Inhibition of NQO1 or NQO2 by hydroxydiclofenac

**Figure S4** Enzyme kinetics of DCPIP reduction by NQO2 and determination of  $K_i$  and mode of inhibition of tacrine

**Figure S5** Cytotoxicity of amodiaquine quinone imine in pooled primary human hepatocytes.

**Table S1** Cytosolic protein contents of 20 liver preparations.

| <b>Donor<br/>Preparation</b> | <b>Cytosolic protein<br/>content<br/>(mg / g liver)</b> |
|------------------------------|---------------------------------------------------------|
| B1327T                       | 375                                                     |
| S1329T                       | 269                                                     |
| S1332T                       | 219                                                     |
| S1334T                       | 198                                                     |
| S1336T                       | 256                                                     |
| S1339T                       | 283                                                     |
| R1341T                       | 251                                                     |
| S1342T                       | 411                                                     |
| S1343T                       | 150                                                     |
| S1344T                       | 297                                                     |
| S1352T                       | 258                                                     |
| S1356T                       | 107                                                     |
| S1399T                       | 253                                                     |
| S1402T                       | 207                                                     |
| S1404T                       | 234                                                     |
| S1405T                       | 383                                                     |
| S1441T                       | 328                                                     |
| S1442T                       | 257                                                     |
| S1446T                       | 293                                                     |
| S1449T                       | 210                                                     |

**Table S2** Inhibition of recombinant NQO1 and NQO2 by parent drugs used in this study. All inhibition experiments were performed in 96-well format in 100 mM KPi buffer containing 2 mM EDTA, 5 mM MgCl<sub>2</sub> and 0.18 mg/ml BSA (pH 7.4). Before starting the reactions, incubations were pre-incubated at 37 °C for 15 min. Concentrations of substrate were chosen at respective Km concentrations, which were previously determined in house in identical format. When 100% inhibition was achieved, K<sub>i</sub> values were determined by fitting the data to log(inhibitor) vs. normalized response equation implemented in GraphPad Prism. NQO1 inhibition was investigated by monitoring incubations containing 5 nM NQO1 with 4 μM DCPIP, 100 μM NADPH and inhibitor at 600 nm in time (Bio-Tek Powerwave X 340). NQO2 inhibition was investigated by incubating a) 15 nM NQO2, 25 μM menadione and 100 μM BNAH, b) 50 nM NQO2, 25 μM DCPIP and 100 μM BNAH or c) 75 nM NQO2, 30 μM MTT and 500 μM BNAH which were monitored by a) fluorescence of BNAH (excitation 355 nm and emission 460 nm, Victor 3 Perkin Elmer <sup>1</sup>), b) absorption of DCPIP (600 nm, Bio-Tek Powerwave X 340) or c) absorbance of formazan (product of MTT reduction, 610 nm, Bio-Tek Powerwave X 340). C<sub>max</sub> values were from literature.<sup>2-6</sup>

| Enzyme | substrate | Inhibitor      | K <sub>i</sub> <sup>a</sup> | C <sub>max</sub> (μM) |
|--------|-----------|----------------|-----------------------------|-----------------------|
| NQO1   | DCPIP     | Dicumarol      | 170 ± 1 nM                  | 14.5                  |
|        |           | Diclofenac     | 13 ± 1 μM                   | 5                     |
|        |           | Mefenamic Acid | 40 ± 1 μM                   | 29                    |
|        |           | Acetaminophen  | > 1 mM                      | 100                   |
|        |           | Amodiaquine    | > 100 μM                    | 0.11                  |
|        |           | Carbamazepine  | 811 ± 1 μM                  | 38                    |
| NQO2   | Menadione | Resveratrol    | 2 ± 0.001 μM                | 0.3                   |
|        |           | Diclofenac     | > 1 mM                      | 5                     |
|        |           | Mefenamic Acid | 66 ± 1 μM                   | 29                    |
|        |           | Acetaminophen  | > 1 mM                      | 100                   |
|        |           | Amodiaquine    | 160 ± 1 μM                  | 0.11                  |
|        |           | Clozapine      | 746 ± 2 μM                  | 1                     |
|        | DCPIP     | Resveratrol    | 28 ± 1 μM                   | 0.3                   |
|        |           | Diclofenac     | > 1 mM                      | 5                     |
|        |           | Mefenamic Acid | > 500 μM                    | 29                    |
|        |           | Carbamazepine  | > 500 μM                    | 38                    |
|        | MTT       | Resveratrol    | 133 ± 2 μM                  | 0.3                   |
|        |           | Diclofenac     | > 1 mM                      | 5                     |
|        |           | Mefenamic Acid | > 500 μM                    | 29                    |
|        |           | Carbamazepine  | > 500 μM                    | 38                    |

<sup>a</sup> Values are presented as mean ± S.D. (n=3)

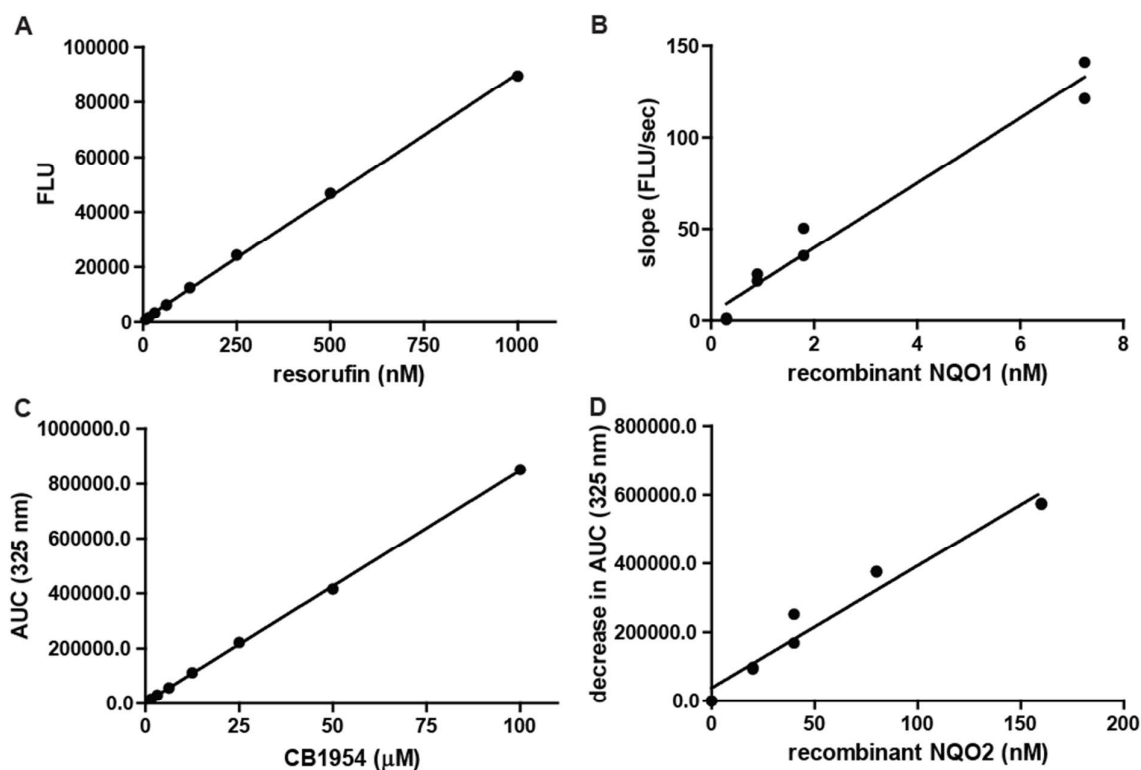

**Figure S1** Calibration curves of resorufin (A), recombinant NQO1 activity in resorufin reduction (B), CB1954 (C) and NQO2 activity in CB1954 reduction (D). Incubations were performed as described in materials and methods.

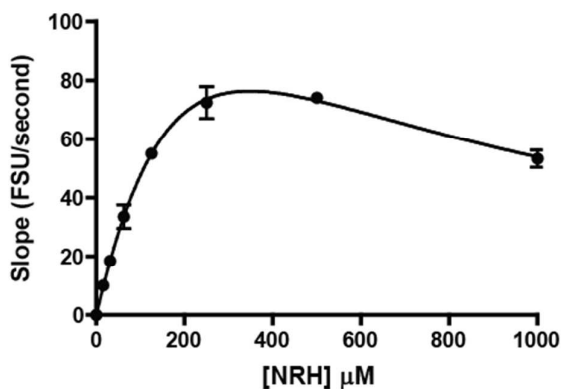

**Figure S2** Enzyme kinetics of co-substrate NRH oxidation by NQO2, in presence of the substrate menadione. 100 nM of recombinant NQO2 was pre-incubated with NRH (0-1000  $\mu$ M) in 100 mM  $\text{KH}_2\text{PO}_4$  buffer containing 2 mM EDTA, 5 mM  $\text{MgCl}_2$  and 0.18 mg/ml BSA (pH 7.4) for 15 minutes at 37  $^\circ\text{C}$  in a 96 well plate. Reactions were started by addition of 100  $\mu$ M (final) menadione and depletion of NRH was measured monitored in time for 2 min (excitation 355 nm and emission 460 nm, Victor 3 Perkin Elmer <sup>1</sup>). The y-axis shows the decrease of arbitrary fluorescence units (FSU)/second. Data is corrected for chemical reduction and represent means of triplicates. Data is

fitted in Graphpad Prism (version 5.0) using the substrate inhibition model. Data represents the mean and S.D. of triplicates.

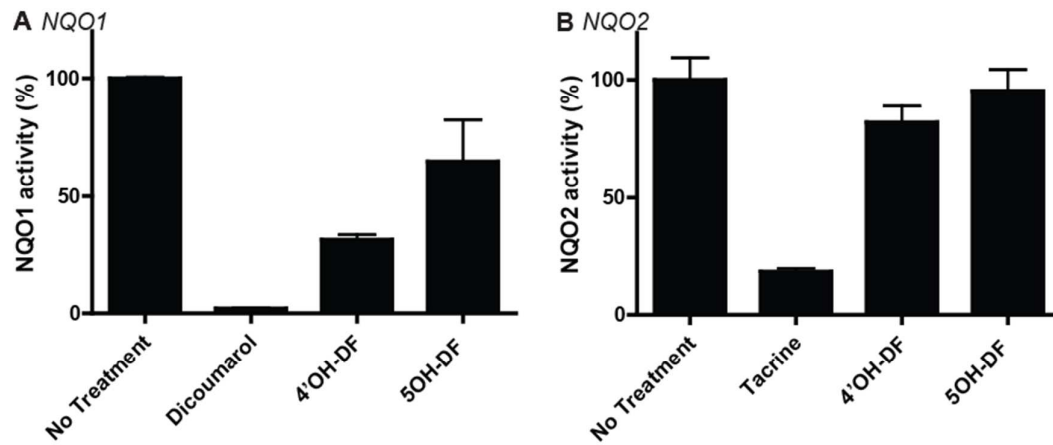

**Figure S3** Inhibition of NQO1 or NQO2 by hydroxydiclofenac. Quinone reductases (5 nM NQO1 or 50 nM NQO2) were pre-incubated with 100  $\mu$ M co-substrate (NADPH for NQO1, NRH for NQO2) with or without inhibitor (50  $\mu$ M) in 100 mM KPi buffer containing 2 mM EDTA, 5 mM  $MgCl_2$  and 0.18 mg/ml BSA (pH 7.4) for 15 minutes at 37  $^{\circ}C$  in a 96 well plate. Reactions were started by addition of 25  $\mu$ M (final) DCPIP. DCPIP reduction was followed in time at 600 nm, for 2 min (Bio-Tek Powerwave X 340). Abbreviations: 4'OH-DF, 4'hydroxydiclofenac; 5OH-DF, 5-hydroxydiclofenac. Data represents the average and range of duplicates.

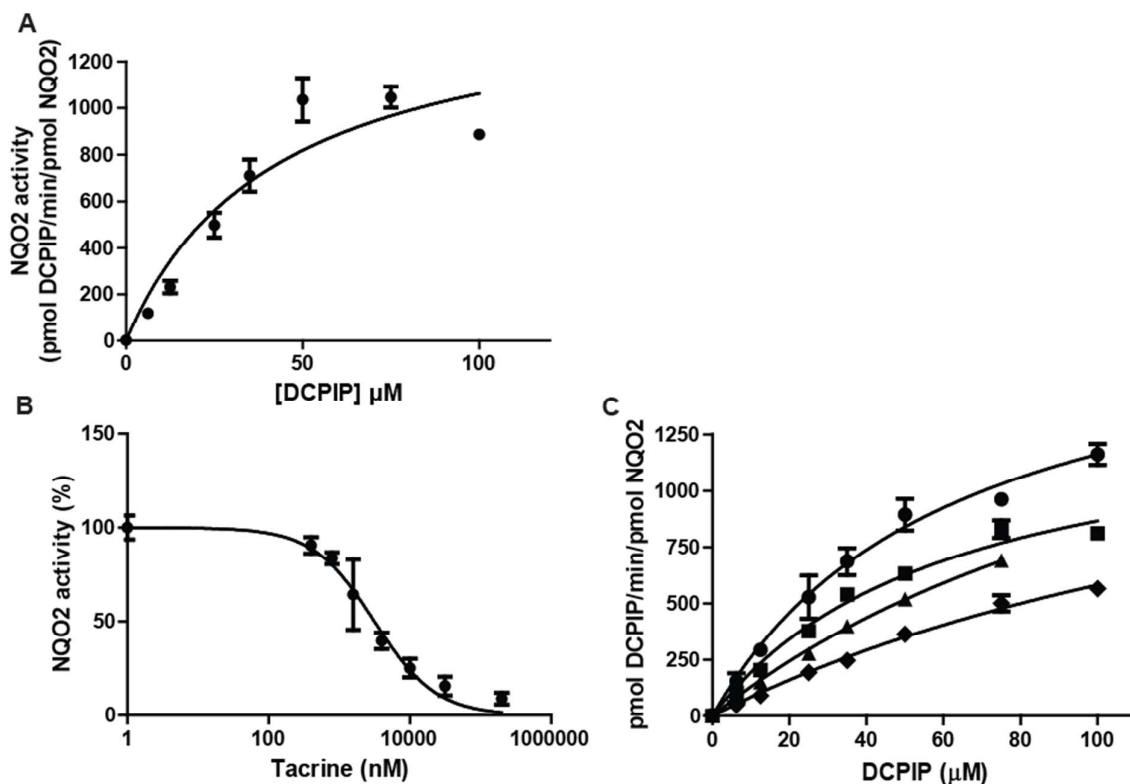

**Figure S4** Enzyme kinetics of DCPIP reduction by NQO2 (A) and determination of  $K_i$  (B) and mode of inhibition (C) of tacrine. Incubations were performed in 96 well format in 100 mM KPi containing 2 mM EDTA, 5 mM  $\text{MgCl}_2$  and 0.18 mg/ml BSA. Enzyme kinetics were investigated by pre-incubation of 50 nM of NQO2 with 100  $\mu\text{M}$  BNAH for 15 minutes at 37 °C. Reactions were started by addition of DCPIP (6.25-100  $\mu\text{M}$ ) and absorbance at 600 nm was followed in time (Bio-Tek Powerwave X 340). The  $K_m$  value (25  $\mu\text{M}$ ) was determined by fitting the data to the Michaelis Menten equation in Graphpad Prism (version 5.0). The  $K_i$  (A) and mode of inhibition (B) was investigated under similar conditions. For determination of the  $K_i$  (A,  $3 \pm 1$   $\mu\text{M}$ ) tacrine (0-200  $\mu\text{M}$ ) was included in the pre-incubation. Data was fitted to  $\log(\text{inhibitor})$  vs. normalized response equation implemented in GraphPad Prism (version 5.0). For the mode of inhibition (B) tacrine was excluded (circles) or included at its IC25 (squares, 1  $\mu\text{M}$ ), IC50 (triangles, 3  $\mu\text{M}$ ) or IC75 (diamonds, 7  $\mu\text{M}$ ) concentrations. Data was analyzed using the Menten equation in Graphpad Prism (version 5.0). Both  $K_m$  and  $V_{max}$  changed in presence of tacrine, identifying tacrine as a mixed-type inhibitor. Data represents the mean and S.D. of triplicates.

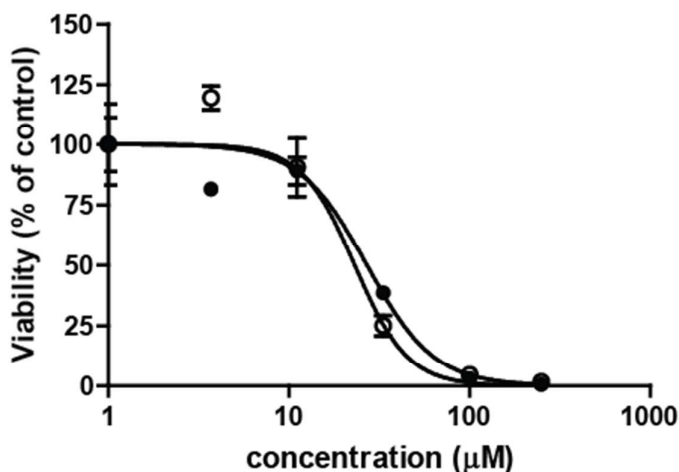

**Figure S5** Cytotoxicity of amodiaquine quinone imine in pooled primary human hepatocytes (P2109A, KalyCell). Primary human hepatocytes were incubated in suspension as described before.<sup>7,8</sup> Cells were exposed to selected concentrations of amodiaquine quinone imine (0.1% final DMF) in presence (open circles) or absence (closed circles) of 20 µM dicoumarol. Dicoumarol was pre-incubated for 15 minutes. Following an incubation with amodiaquine quinone imine of 2 hours, cytotoxicity was assessed using reduction of resazurin as viability marker as described before.<sup>7</sup> IC<sub>50</sub> values were 23 µM and 27 µM (in presence or absence of dicoumarol, respectively) and were not significantly different. Data represents the average and range of duplicates.

#### References:

- (1) Long, D. J., Iskander, K., Gaikwad, A., Arin, M., Roop, D. R., Knox, R., Barrios, R., and Jaiswal, A. K. (2002) Disruption of dihydronicotinamide riboside:quinone oxidoreductase 2 (NQO2) leads to myeloid hyperplasia of bone marrow and decreased sensitivity to menadione toxicity. *J. Biol. Chem.* 277, 46131–9.
- (2) Verner, M., Magher, T., and Haddad, S. (2010) High concentrations of commonly used drugs can inhibit the in vitro glucuronidation of bisphenol A and nonylphenol in rats. *Xenobiotica.* 40, 83–92.
- (3) Sinou, V., Malaika, L. T. M., Taudon, N., Lwango, R., Alegre, S. S., Bertaux, L., Sugnaux, F., Parzy, D., and Benakis, A. (2009) Pharmacokinetics and pharmacodynamics of a new ACT formulation: Artesunate/Amodiaquine (TRIMALACT) following oral administration in African malaria patients. *Eur. J. Drug Metab. Pharmacokinet.* 34, 133–142.
- (4) Sergides, C., Chirilă, M., Silvestro, L., Pitta, D., and Pittas, A. (2016) Bioavailability and safety study of resveratrol 500 mg tablets in healthy male and female volunteers. *Exp. Ther. Med.* 11, 164–170.
- (5) MacHeras, P. E., and Reppas, C. I. (1986) Studies on drug-milk freeze-dried formulations I:

Bioavailability of sulfamethizole and dicumarol formulations. *J. Pharm. Sci.* 75, 692–696.

(6) Sramek, J. J., Anand, R., Hartman, R. D., Schran, H. F., Hourani, J., Barto, S., Wardle, T. S., Shiovitz, T. M., and Cutler, N. R. (1999) A Bioequivalence Study of Brand and Generic Clozapine in Patients with Schizophrenia. *Clin. Drug Investig.* 17, 51–58.

(7) Richert, L., Baze, A., Parmentier, C., Gerets, H. H. J., Sison-Young, R., Dorau, M., Lovatt, C., Czich, A., Goldring, C., Park, B. K., Juhila, S., Foster, A. J., and Williams, D. P. (2016) Cytotoxicity evaluation using cryopreserved primary human hepatocytes in various culture formats. *Toxicol. Lett.* 258, 207–215.

(8) Alexandre, E., Viollon-Abadie, C., David, P., Gandillet, A., Coassolo, P., Heyd, B., Manton, G., Wolf, P., Bachellier, P., Jaeck, D., and Richert, L. (2002) Cryopreservation of adult human hepatocytes obtained from resected liver biopsies. *Cryobiology* 44, 103–13.
